# Supplementary material for: Record of low-temperature aqueous alteration of Martian zircon during the late Amazonian
Source: PubMed Central journal article supplement (PMC6559952; doi:10.1038/s41467-019-10382-y), 2019-06-11
Supplement: 41467_2019_10382_MOESM2_ESM.pdf [file 41467_2019_10382_MOESM2_ESM.pdf]

## Description of Additional Supplementary Files

File Name: Supplementary Data 1

Description: U-Th-Pb isotope data for terrestrial igneous zircons

File Name: Supplementary Data 2

Description: U-Th-Pb isotope data for Hadean zircons from Western Australia

File Name: Supplementary Data 3

Description: U-Th-Pb isotope data for lunar zircons

File Name: Supplementary Data 4

Description: U-Th-Pb isotope data for Martian zircons

File Name: Supplementary Data 5

Description: Model details and results for zircon Z2
